1 **BEHAVIORAL AND PHYSIOLOGICAL EVIDENCE THAT INCREASING GROUP SIZE AMELIORATES**  
2 **THE IMPACTS OF SOCIAL DISTURBANCE**

3 Hannah M. Anderson<sup>1\*</sup>, Alexander G. Little<sup>1,2\*</sup>, David N. Fisher<sup>1</sup>, Brendan L. McEwen<sup>1</sup>, Brett  
4 M. Culbert<sup>3</sup>, Sigal Balshine<sup>1†</sup>, Jonathan N. Pruitt<sup>1,2†</sup>

5 \* and † denote equal contributions

6 <sup>1</sup>Department of Psychology, Neuroscience & Behaviour, McMaster University, Hamilton, ON,  
7 Canada L8S 4K1

8 <sup>2</sup>Marine Science Institute, University of California Santa Barbara, Santa Barbara, CA, USA  
9 93106

10 <sup>3</sup>Department of Integrative Biology, University of Guelph, Guelph, ON, Canada N1G 2W1

11

12 **KEY WORDS:** complex system, cooperation, dominance hierarchy, social perturbation, social  
13 scaling, sociality

14

15 **Corresponding Author:** Hannah Anderson, [anderh3@mcmaster.ca](mailto:anderh3@mcmaster.ca)

16

## SUMMARY STATEMENT

17 Social stability is vital for group productivity and long-term persistence. Here, both behavioral  
18 and physiological evidence conveys that larger groups are less susceptible to social disturbance.

19

20

## ABSTRACT

21 Intra-group social stability is important for the long-term productivity and health of social  
22 organisms. We evaluated the effect of group size on group stability in the face of repeated social  
23 perturbations using a cooperatively breeding fish, *Neolamprologus pulcher*. In a laboratory  
24 study, we compared both the social and physiological responses of individuals from small versus  
25 large groups to the repeated removal and replacement of the most dominant group member (the  
26 breeder male). Individuals living in large groups were overall more resistant to instability but  
27 were seemingly slower to recover from perturbation. Members of small group were more  
28 vulnerable to instability but recovered faster. Breeder females in smaller groups also showed  
29 greater physiological preparedness for instability following social perturbations. In sum, we  
30 recover both behavioral and physiological evidence that living in larger groups helps to dampen  
31 the impacts of social instability in this system.

32

33

## INTRODUCTION

34 Living in groups has various costs and benefits. For instance, group living can increase foraging  
35 efficiency (Berger, 1978), decrease predation risk (Foster and Treherne, 1981), and increase  
36 collective reproductive output (Modlmeier et al., 2012). In contrast, living in groups can  
37 sometimes decrease average per capita reproductive output (Bilde et al., 2007), promote disease  
38 transmission (Kappeler et al., 2015), and increase competition for food (Symington, 1988). For  
39 group living to evolve, the weight of the combined benefits of grouping must exceed the costs,  
40 and any factor that maximizes benefits whilst minimizing the costs of living in groups should  
41 promote the evolution of group-living and help to optimize sociality once it has evolved.

42 One factor thought to help maximize the cost/benefit ratio of group living is social  
43 stability. For instance, increased familiarity among group members can allow for increased social  
44 niche specialization (Laskowski and Pruitt, 2014), reduced within-group competition (Laskowski  
45 and Pruitt, 2014), and increased group productivity (Modlmeier et al., 2012). Familiarity of  
46 groupmates can also enhance the effects of social buffering against environmental challenges  
47 (Hennessy et al., 2000; Livia Terranova et al., 1999) and decrease overall stress levels (Culbert et  
48 al., 2018; Kikusui et al., 2006; Nadler et al., 2016). Group stability also helps to reduce the costs  
49 of group living. For example, stable groups composed of familiar individuals experience less  
50 internal conflict, and so experience less stress from the threat of aggression or eviction (Pardon et  
51 al., 2004), reduced risk of injury, and waste fewer resources in competition (Marler, Walsberg,  
52 White, Moore, & Marler, 1995; Jordan et al 2010). Even in non-cooperative territorial species,  
53 familiarity among neighbors commonly begets reduced aggression via dear enemy effects (e.g.,  
54 Getty, 1987; Siracusa et al., 2017).

55 Despite the common finding that group stability helps to maximize group success, all  
56 groups in nature must endure some level of instability. Immigration/emigration, birth/death, and  
57 alterations to dominance hierarchies, for example, result in alterations in group membership, and  
58 thus decrease within-group familiarity and stability. Many social species have therefore evolved  
59 mechanisms to help mitigate the negative impacts of such forces. For instance, some groups  
60 exhibit social rules that allow dominance hierarchies to swiftly reorganize following perturbation  
61 (Goldenberg et al., 2016). In other cases, reconciliatory communication mechanisms (e.g.,  
62 specialized vocalization) aid in re-galvanizing damaged social bonds (Waal, 2000; Reddon et al  
63 2019), and even particular individuals can help to dampen the negative impacts of group

64 instability (Flack et al., 2005; Flack et al., 2006; McCowan et al., 2011). The traits that enable  
65 groups to dampen the acute impacts of social instability and to resume their former predictable  
66 states swiftly are important, because *i*) stabilizing traits are potentially important targets for  
67 selection and *ii*) forces that compromise these traits risk imperiling the integrity and function of  
68 the social system.

69 Here we examined how one group trait, group size, impacts the acute behavioral and  
70 physiological responses of group members to social disturbances and recoverability from them.  
71 We elected to focus on group size because it is known to mediate many costs and benefits  
72 associated with group living (Avilés and Tufino, 1998), and because natural groups vary  
73 considerably in their size, with profound impacts on social selection (Brown et al., 2016). We  
74 predicted that living in large groups would diminish the acute impacts of social perturbations and  
75 increase group recoverability by distributing the negative impacts of social disturbance (e.g., acts  
76 of aggression) across more individuals. Larger groups may also recover more swiftly via  
77 enhanced affiliative behavior following social perturbations. We term this the ***distributed***  
78 ***perturbation hypothesis*** here. Alternatively, living in larger groups might increase the negative  
79 impacts of social perturbations (e.g., via increased aggression) or prevent groups from resuming  
80 quiescent behavioral states following disturbance. For instance, aggressive acts might initiate  
81 positive feedback fostering additional aggressive interactions in high-density environments and  
82 thus prevent groups from resuming their former stable states. We term this the ***aggressive***  
83 ***feedback hypothesis***.

84 The impacts of social disturbances are likely to be evidenced physiologically as well. We  
85 therefore evaluated whether group size alters the degree to which group members are  
86 metabolically poised for intense bouts of acute or sustained physical activity following social  
87 perturbation. A higher capacity for intense activity might be necessary in preparation for, or as a  
88 training effect of, increased aggression. Many studies have identified links between various  
89 social behaviors and metabolic rates (see Huntingford, Tamilselvan, & Jenjan, 2012 for review).  
90 However, reliance on oxygen consumption as a proxy for energy metabolism neglects the  
91 anaerobic processes that fuel burst-type movements typically associated with dominance  
92 behaviors (Plaut, 2001). Thus, a more refined focus on the biochemical pathways that underlie  
93 metabolic phenotypes should help elucidate links between physiology and behaviour.

94 Enzymes are catalytic proteins that regulate biochemical reaction rates (Boyer and Krebs,  
95 1986). Their expression is often plastic and can change in response to environmental stressors  
96 over a period of days to weeks (Beaman et al., 2016). Enzymes that catalyze regulatory steps of  
97 greater biochemical pathways can thus be plastically adjusted to meet an organism's peak  
98 metabolic demands in contrasting environments. Thus, *in vitro* measures of regulatory enzyme  
99 activities can represent upper thresholds for their respective pathways, and reflect the maximum  
100 capacity for these pathways to fuel peak activity *in vivo* (e.g. Vigelsø, Andersen, & Dela, 2014).  
101 Indeed, a number of studies have shown that activities of specific metabolic enzymes correlate  
102 strongly with intense social behaviors in a range of animal systems (Gilmour et al., 2017;  
103 Guderley, 2009; Guderley and Couture, 2005; Kasumovic and Seebacher, 2013; Le François et  
104 al., 2005; Regan et al., 2015). In this study we focused on a key regulatory glycolytic enzyme  
105 (lactate dehydrogenase; LDH) and a key regulatory oxidative enzyme (citrate synthase; CS) that  
106 have been shown to reflect capacities for quick burst movements and more sustained aerobic  
107 activities, respectively (e.g. Alp, Newsholme, & Zammit, 1976; Childress & Somero, 1979;  
108 Johnston & Moon, 1981). We hypothesized that LDH and CS activities would scale with the  
109 most intense bouts of dominant actions displayed by an individual, and that these activities  
110 would be highest in individuals from destabilized groups.

111 To address these questions, we use the cooperative breeding cichlid *Neolamprologus*  
112 *pulcher*, endemic to Lake Tanganyika in the African Rift Valley. In the wild groups are usually  
113 comprised of one dominant male-female breeding pair and 1-20 smaller, subordinate, non-  
114 breeding helpers (Balshine et al., 2001; Heg et al., 2019). Groups cooperate to care for the young  
115 of the dominant pair, maintain the group's territory, and defend the territory from both  
116 competitors and predators (Taborsky & Limberger, 1981; Wong & Balshine, 2011a). These fish  
117 also have a clear linear size-based dominance hierarchy, with increasing body size associated  
118 with increasing rank (Balshine-Earn et al., 1998). Natural groups regularly experience turnover  
119 in group members as helpers join or leave a group, or when group members perish (Stiver et al  
120 2006; 2007; Heg et al., 2019; Wong & Balshine, 2011b). Thus, this system provides a convenient  
121 evolutionary context to evaluate the impacts of group size on behavioral and metabolic responses  
122 to social instability and recoverability.

## 123 METHODS

124

125 *Ethics*

126 All experimental protocols were approved by the Animal Research Ethics Board of McMaster  
127 University (Animal Utilization Protocol No. 18-04-16), and were in compliance with the  
128 guidelines set by the Canadian Council on Animal Care (CCAC) regarding the use of animals in  
129 research.

130

131 *Behavioral Methods*

132 Focal fish were haphazardly selected from a lab population containing descendants of wild-  
133 caught *N. pulcher* captured in 2014. Large and small groups were formed with a dominant pair  
134 (the largest male and female in each social group), and either four (“small groups”, n=12) or  
135 eight (“large groups”, n=14) subordinate helper fish. To reduce aggression and mortality,  
136 dominant pairs were taken from pre-existing breeding pairs. All helpers were unfamiliar to the  
137 dominant pair and had not previously cohabitated with them. Following group formation, the  
138 social groups were allowed to habituate and stabilize for five weeks.

139 Each social group was maintained in separate, 189 L aquariums containing two terracotta  
140 pot halves and two small PVC tubes (that served as both shelter and breeding substrate), two 10  
141 cm x 10 cm mirrors, two sponge aeration filters, a heater, and 3 cm deep coral sand as substrate.  
142 The mirrors served as a target of aggression to reduce morbidity from within-group conflict. A  
143 water temperature of 27° C and 13:11 light to dark hour photoperiod was maintained throughout  
144 the study. Each dominant male and female received an identifying dorsal fin clip, which has a  
145 minimal effect on behavior (Stiver et al., 2004). Fish were fed six days a week ad libitum with  
146 Nutrafin® basix large cichlid flakes.

147 Small and large social groups were randomly allocated to either control (large, n=6;  
148 small, n=6) or treatment (large, n=8, small, n=6) conditions. The dominant male (standard  
149 length, SL: average=7.57 cm, SEM=0.92) and dominant female (SL: average=6.66 cm,  
150 SEM=0.86) were measured at the start of the experiment. To avoid confusion with later  
151 measures, these fish will subsequently be referred to as the *breeding male* and *breeding female*.  
152 The standard lengths of all helpers were estimated by an experienced observer (SB) (SL:  
153 average=2.52 cm, SEM=0.07). In the treatment condition, the social perturbation consisted of the  
154 removal of the breeding male from one social group and replacing him with a new, unfamiliar  
155 breeding male that previously dwelled in another social group of identical size, tank set up, and

156 group composition. Therefore, breeding male fish in the treatment groups were swapped between  
157 tanks. We ensured that the breeding males were always larger than the females, as observed in  
158 the wild (Balshine et al., 2001; Desjardins et al., 2008; Wong et al., 2012) In the control  
159 condition, the breeding male fish were removed from their tanks, handled for the same duration  
160 as the treatment males, but then returned to their home tank. This social disturbance procedure  
161 occurred twice (trial 1 and trial 2), with the manipulations conducted one week apart. All tanks  
162 were perturbed on the same day. Perturbations were conducted twice to permit group members  
163 time to deploy an enzymatic response to reliably stable vs. perturbed social conditions.

164 Behavioral observations were recorded using Canon VIXIA HF r-series cameras  
165 immediately before the manipulation, immediately following the manipulation, and then four,  
166 and twenty-four hours following the manipulation. In addition, two baselines were recorded  
167 twenty-four and forty-eight hours prior to the first manipulation. Focal observation recordings  
168 were all fifteen minutes long. The first five minutes of each recording were discarded to account  
169 for potential disturbance on remaining group members from capturing and returning the  
170 dominant male fish and human presence. All videos were scored by the same observer (HA),  
171 who was blind to treatment condition and time step. Behaviors were coded using McMaster  
172 University's Animal Behavior Ecology Laboratory (ABEL) *N. pulcher* ethogram (Sopinka et al.,  
173 2009) and Behavioral Observation Research Interactive Software (BORIS) (Friard and Gamba,  
174 2016). Behaviors were subdivided into the categories, "aggression" (chase, bite, ram, puffed  
175 throat, mouth-fighting, pseudo-mouth-fighting and head shake)), "submission", (submissive  
176 posture, submissive display, flee/chased and bitten)) and "affiliation" (soft touch, following, and  
177 parallel swim).

178 We calculated a Dominance Index (DI) for each breeding male, breeding female, and for  
179 each group of helpers divided per capita, for each recording session. The DI is a well-established  
180 method for calculating dominance rank and  $= (\text{sum of aggressive acts given} + \text{sum of submissive}$   
181  $\text{acts received}) - (\text{aggressive acts received} + \text{submissive acts given})$ . We calculated an affiliation  
182 index for each breeding male, breeding female, and for each group of helpers divided per capita,  
183 for each recording session, where affiliation rank and  $= (\text{sum of social acts given} + \text{sum of social}$   
184  $\text{acts received})$ . We also recorded the most dominant time step for breeding females in each tank,  
185 herein referred to as the *maximum dominance index observed*. Specifically, the maximum  
186 dominance index observed represents the DI of the time period with the highest levels of

187 aggressive and submissive behaviors. This term therefore reflects what are presumably the most  
188 stressful and metabolically demanding moments we observed (Grantner and Taborsky, 1998).

189 The breeding female of each group was captured and rapidly ( $\leq 3$  minutes) euthanized via  
190 overdose of benzocaine within forty-eight hours of the final perturbation. Females were  
191 measured and their skeletal muscle just posterior to the dorsal fin, heart, and liver were harvested  
192 and massed for further analyses.

193

#### 194 *Enzyme Assays*

195 In short, tissues were homogenized in 1:10 (m/v) homogenization buffer (0.1% Triton, 50 mM  
196 Hepes, 1mM EDTA, pH 7.4; CAT: 100 mM K phosphate buffer, 100 mM KCl, 1 mM EDTA,  
197 pH 7.4) on ice. Skeletal muscle homogenates were further diluted to 1:400 for the LDH activity  
198 assay, whereas liver homogenates were diluted to 1:20 for both LDH and CS activity assays.  
199 Skeletal muscle homogenates were not further diluted for CS activity assays. All assays were run  
200 at 27°C in 96-well format on a Spectramax Plus 384 microplate reader (Molecular Devices,  
201 Sunnyvale, CA). We used a wavelength of 340 nm to measure the disappearance of NADH (for  
202 LDH activity), and a wavelength of 412 nm to measure the production of 2-nitro-5-thiobenzoic  
203 acid (TNB; as a proxy of CS activity). Extinction coefficients of  $6.22 \text{ mM}^{-1} \text{ cm}^{-1}$  and  $13.6 \text{ mM}^{-1}$   
204  $\text{cm}^{-1}$  were used for LDH and CS, respectively.

205

#### 206 *Analyses and Statistical Methods*

207 Dominance and affiliation indices were analyzed using a mixed linear model (GLMM) fit by  
208 REML using the free and open software JAMOVI (Version 0.9; GAMLj module;  
209 <https://www.jamovi.org>). We fitted tank number as a random effect, and focal individual class  
210 (i.e. female, male, helpers), treatment type (i.e. control vs. treatment), group size, trial number  
211 (i.e. trial 1 or trial 2), and timepoint (i.e. immediately before the manipulation, immediately after,  
212 four hours after and twenty-four hours after the manipulation) as fixed effects. We started with a  
213 saturated model and pruned non-significant terms (starting with high-order interactions) until we  
214 arrived at a model where all fixed effects were significant. *Post-hoc* analyses consisted of  
215 Bonferroni-corrected pairwise comparisons.

216 To analyze the relationship between body traits (mass, relative heart mass, liver mass)  
217 and the maximum dominance index observed during the experiment on metabolic capacity



218 (glycolytic and aerobic) across females, we used general linear models (GLM) fit by OLS. For  
219 the maximum dominance index observed, we fitted treatment type and group size (factors) and  
220 body mass, relative heart mass, and liver mass (continuous covariates) as fixed effects. For  
221 metabolic capacity, LDH activity in either the muscle or the liver, or CS activity in either the  
222 muscle or the liver represented the dependent variable. Treatment type, group size (factors),  
223 maximum dominance index observed, body mass, and other enzyme activity levels (continuous  
224 covariates) were fitted as fixed effects. We used the maximum dominance index observed as a  
225 fixed effect because LDH and CS measures convey individuals' capacities for peak activity.  
226 Thus, in addition to generalized locomotor activity these effects also likely determine maximum  
227 capacities for social activities (e.g. aggression, flight, and dominance), rather than baseline  
228 averages. We again started with a saturated model and pruned non-significant terms (starting  
229 with high-order interactions) until we arrived at a model where all fixed effects were significant.  
230 As a *post-hoc* approach to test whether the effects of maximum dominance on enzyme activities  
231 were a potential effect of activity levels, we fitted respective models using mean activity  
232 measures as a covariate in place of maximum dominance. For all statistical tests, we used a  
233 significance threshold of  $\alpha = 0.05$ .

234

## 235 **RESULTS**

### 236 *Behavioral responses*

237 We detected a significant four-way interaction between class, treatment type, group size, and  
238 time point on individuals' dominance scores (Table 1; Fig. 1A-D). In control tanks housing small  
239 groups, male dominance was consistently more than five-fold greater than that of females, although  
240 this trend was significant only immediately after the control perturbation (Fig. 1A; S1 for  
241 pairwise comparisons). In control tanks housing large groups, there were no significant  
242 differences in dominance between the males, females, and helpers; although the helpers  
243 consistently had a five-fold lower dominance scores than both the males and females (Fig. 1B;  
244 S1). These results suggest that male aggression is more pronounced in small control groups and  
245 that females display more submissive acts in response.

246 In treatment tanks housing small groups, we found that the dominance indices of the  
247 females were significantly lower than that of the males at all time points, especially immediately  
248 following the perturbation (Fig. 1C; S1). However, in treatment tanks housing large groups there

249 was a delayed spike in male dominance relative to females, where no significant difference in  
250 dominance between males and females was apparent until four-hours after the perturbation (Fig.  
251 1D; S1). As expected, helper dominance remained significantly lower than male dominance  
252 across all time points in both group sizes. There was no significant effect of trial number (i.e.  
253 perturbation 1 vs. perturbation 2) in any of the analyses.

254 There was a significant interaction term between group size, treatment, and time point on  
255 social affiliation scores. We further detected a significant interaction term between trial number  
256 and time point, and a main effect of individuals' class (female, male, helper) on social affiliation  
257 scores (Table 1; Fig. 1E-H). While there was no effect of group size on affiliation scores in the  
258 control groups, affiliation conspicuously increased following perturbation in the large treatment  
259 groups relative to the small treatment groups. Groups gradually increased affiliative behaviors  
260 following the introduction of a new male, but somewhat decreased affiliative behavior following  
261 the introduction of a second new male (Table 1; see appendix for pairwise comparisons). Finally,  
262 females had the highest affiliation index followed by males, and then by helpers in the treatment  
263 groups (Fig. 1E-H; Table 1; S2 for pairwise comparisons).

264 We found an interaction between body mass and group size on the maximum dominance  
265 index observed (Table 2; Fig. 2a). Here, maximum scores for dominance increased with female  
266 body size in small groups and decreased with body size in large groups. There were no  
267 significant effects of relative heart or liver size on maximum scores for dominance, and no main  
268 effect of treatment type (i.e. control vs. treatment).

269

### 270 *Enzyme responses*

271 There was a significant interaction between female dominance and group size on muscle LDH  
272 activity (Table 2; Fig. 2B). Muscle LDH activity scaled positively with dominance in small  
273 groups and it scaled negatively with dominance in large groups, suggesting that breeding females  
274 were more poised for intense bursts of activity in smaller groups. We also found that both liver  
275 and skeletal muscle LDH activities scaled negatively with female dominance in control groups,  
276 and positively with female dominance in treatment groups (Table 2; Fig. 2C, D). These results  
277 convey that our social perturbation treatment was successful in causing the breeding females to  
278 be enzymatically prepared for sudden bursts of activity. We found no significant effects of  
279 dominance on liver or muscle CS activity (Table 2), which is associated with endurance

280 activities and aerobic metabolism. Instead, the anaerobic component of metabolism as captured  
281 by LDH activity was more responsive to our social perturbations. *Post-hoc*, we found no  
282 significant effects of mean level of female activity on liver or skeletal muscle LDH activities  
283 (appendix 4), suggesting that maximum dominance affects glycolytic capacity independently  
284 from greater levels of general locomotor activity.

285

286

287

## DISCUSSION

288 Group stability tends to increase the benefits and decrease the costs of social living (Berger,  
289 1978; Laskowski and Pruitt, 2014; Modlmeier et al., 2012), and groups often exhibit mechanisms  
290 to return to a stable state following disturbance (Goldenberg et al., 2016; McCowan et al., 2011;  
291 Waal, 2000). We sought to determine the effects of group size on the group's ability to return to  
292 social homeostasis in the face of a repeated social stressor. Specifically, we hypothesized a large  
293 group would either reduce overall aggression, through the *distributed perturbation hypothesis*, or  
294 increase and sustain overall aggression, through the *aggressive feedback hypothesis*. Here we  
295 found more support for the *distributed perturbation hypothesis*, though additional moderating  
296 forces are also likely at play.

297 Small groups showed more disparate dominance indices between the most dominant fish  
298 (breeding males) and the subordinate fish (breeding females and helpers). This is most obvious  
299 when comparing the control groups (Fig. 1A,B). Previous studies have found a positive  
300 relationship between group size and long-term group survival (Heg et al., 2019), with large  
301 groups benefitting from higher quality territories and more opportunities to feed (Balshine et al.,  
302 2001). These latest results further imply that small groups may be inherently more polarized (and  
303 less stable) than large groups, even when social conditions remain relatively steady. In other  
304 words, large groups likely benefit from both material and non-material social advantages. The  
305 timing of dominance index spikes varied with group size in our treatment groups: in small  
306 groups, changes to and inequality of dominance indices appeared immediately following the  
307 perturbation (Fig. 1C), while in large groups change in the indices lagged following perturbation  
308 (Fig. 1D). Small groups also appear to slide back towards baseline states faster, as observed in  
309 the apparent reduction in breeding male dominance twenty-four hours following the  
310 perturbations, while the dominance of large group males remain elevated. Together, these results

311 suggest that large groups are more resistant to social state change and/or that state change in  
312 large groups is slower than in small groups. This could be because new males delay asserting  
313 their dominance in larger groups until they have had time to evaluate their new social setting and  
314 potential competitors. Regardless of the mechanism, this conveys that larger groups might offer  
315 their constituents buffering effects against ephemeral social perturbations in a manner small  
316 groups do not.

317 Additional circumstantial evidence from affiliation indices and body mass hint that  
318 smaller groups are more stressful social environments following perturbation. One can observe  
319 an increase in the affiliative behaviors of males and especially females following social  
320 perturbations in large groups (Fig. 1H). This conveys that the new breeding pair begins  
321 establishing a social bond in these groups. If this happens in small groups too, then it is certainly  
322 less conspicuous (Fig. 1G). We further note that large females exhibit higher dominance in small  
323 groups, irrespective of control vs. treatment, whereas no relationship between body size and  
324 dominance was observed in large social groups. This group-size dependent relationship conveys  
325 that more volatile acts of dominance transpire in small groups occupied by large females,  
326 whereas the dominance indices of females in large groups are near uniformly low (Fig. 2A).  
327 This lack of variation in large groups provides further evidence that large social groups are less  
328 volatile and more stable social environments than small groups. In *N. pulcher* the strength of  
329 social buffering is largely managed by aggression rates (Culbert et al., 2019), so the decreased  
330 aggression found in these large groups might facilitate recovery from social perturbation.  
331 Elevated LDH activities in muscle and liver suggest enhanced glycolytic preparedness and  
332 capacity for the powerful burst movements that characterize aggressive acts (Le François et al.,  
333 2005). In Arctic charr (*Salvelinus alpinus*), for instance, fast-twitch muscle fibers of dominant  
334 individuals possess LDH activities more than 15% greater than their subordinate counterparts  
335 (Le François et al., 2005). Our work, however, shows that group size directionally mediates the  
336 relationship between dominance and glycolytic capacity. LDH activity was highest in the most  
337 dominant animals but only in small groups, which also have the most disparate dominance  
338 indices between males and females (Fig. 1A, C). In large groups however, more dominant  
339 females were characterized by lower LDH activity levels. These trends suggest that the more  
340 dominant females in small groups must be better primed to perform (or potentially avoid)  
341 aggressive actions, while the more dominant females in large groups are not. Whether these

342 phenotypic differences reflect a regulated response to social stress, a positive feedback effect of  
343 training, or a combination of the two, remains to be examined. However, the lack of relationship  
344 between these enzyme measures and greater female activity levels suggests these trends are not  
345 simply a feedback effect of exercise training. Together, our findings suggest that breeding  
346 females in small groups experience greater instability following disturbance and are  
347 metabolically prepared for more instability.

348 The divergent relationship between dominance and LDH activity provides evidence that  
349 our social perturbations were successful in instigating an enzymatic response in females. Muscle  
350 and liver LDH activities increased with female dominance in treatment groups, which were  
351 characterized by the largest gaps in dominance between males and females. This further suggests  
352 that female dominance increases metabolic preparedness for aggression in these groups relative  
353 to controls. By contrast, in the control condition, LDH activity levels decreased with female  
354 dominance, suggesting greater dominance is associated with reduced glycolytic capacity and  
355 potentially greater stability in these groups. Because the control perturbation was characterized  
356 by a familiar male, we suggest that preestablished social relationships dampen the aggressive  
357 actions that foster glycolytic capacity.

358 Overall, we found more support for the *distributed perturbation hypothesis* from both  
359 behavioral and physiological indicators. Physiologically, breeding females elevated their  
360 glycolytic capacity in small groups and when faced with strong social perturbations (treatment).  
361 Behaviorally, small groups also showed a larger difference in dominance indices across group  
362 members, while in large groups' dominance indices were slower to polarize following a  
363 perturbation and were associated with a surge of affiliative behaviors as well, both observations  
364 circumstantially supporting the *distributed perturbation hypothesis*. On the other hand, the gap in  
365 dominance indices shrunk faster following the perturbation in small groups compared to large,  
366 potentially supporting the *aggressive feedback hypothesis*. It therefore appears that different  
367 group sizes create different responses to the forces of instability: small groups experience larger  
368 instability following a social perturbation, recover more rapidly but are physiologically primed  
369 for more instability, whereas large groups are more resistant to the instability of perturbation but  
370 appear to recover more slowly. In aggregate, these results convey that the demographic traits of  
371 social groups can play a large role in shaping group susceptibility to and recoverability from

372 social disturbance and that larger groups could exhibit greater levels of social stability and social  
373 inertia.

374

### 375 **Acknowledgements**

376 Funding for these studies herein was generously provided by the Natural Sciences and  
377 Engineering Research Council of Canada Discovery Grants to JNP and SB and the Canada 150  
378 Research Program to JNP.

379

### 380 **Competing Interests**

381 No competing interests declared.

382

### 383 **Data Availability**

384 Behavioral data will be uploaded upon completion as supplementary.

385

386

## REFERENCES

387 **Alp, P. R., Newsholme, E. A. and Zammit, V. A.** (1976). Activities of citrate synthase and  
388 NAD<sup>+</sup> linked and NADP<sup>+</sup> linked isocitrate dehydrogenase in muscle from vertebrates and  
389 invertebrates. *Biochem. J.* **154**, 689–700.

390 **Avilés, L. and Tufino, P.** (1998). Colony size and individual fitness in the social spider  
391 *Anelosimus eximius*. *Am. Nat.* **152**, 403–418.

392 **Balshine-Earn, S., Neat, F. C., Reid, H. and Taborsky, M.** (1998). Paying to stay or paying to  
393 breed? Field evidence for direct benefits of helping behavior in a cooperatively breeding  
394 fish. *Behav. Ecol.* **9**, 432–438.

395 **Balshine, S., Leach, B., Neat, F., Reid, H., Taborsky, M. and Werner, N.** (2001). Correlates  
396 of group size in a cooperatively breeding cichlid fish (*Neolamprologus pulcher*). *Behav.*  
397 *Ecol. Sociobiol.* **50**, 134–140.

398 **Beaman, J. E., White, C. R. and Seebacher, F.** (2016). Evolution of Plasticity: Mechanistic  
399 Link between Development and Reversible Acclimation. *Trends Ecol. Evol.*

400 **Berger, J.** (1978). Group Size, Foraging, and Antipredator Ploys: An Analysis of Bighorn  
401 Sheep Decisions. *Behav. Ecol. Sociobiol.* **4**, 91–99.

402 **Bilde, T., Coates, K. S., Birkhofer, K., Bird, T., Maklakov, A. A., Lubin, Y. and Avilés, L.**

- 403 (2007). Survival benefits select for group living in a social spider despite reproductive costs.  
404 *J. Evol. Biol.* **20**, 2412–2426.
- 405 **Boyer, P. D. and Krebs, E. G.** (1986). *The Enzymes: Control by Phosphorylation, Part A.*  
406 Third. (ed. Boyer, P. D.) and Krebs, E. G.) Orlando, Florida: Academic Press.
- 407 **Brown, C. R., Brown, M. B., Roche, E. A., O'Brien, V. A. and Page, C. E.** (2016).  
408 Fluctuating survival selection explains variation in avian group size. *Proc. Natl. Acad. Sci.*  
409 *U. S. A.* **113**, 5113–5118.
- 410 **Childress, J. J. and Somero, G. N.** (1979). Depth-related enzymic activities in muscle, brain  
411 and heart of deep-living pelagic marine teleosts. *Mar. Biol.* **52**, 273–283.
- 412 **Culbert, B. M., Gilmour, K. M. and Balshine, S.** (2018). Stress axis regulation during social  
413 ascension in a group-living cichlid fish. *Horm. Behav.* **103**, 121–128.
- 414 **Culbert, B. M., Gilmour, K. M. and Balshine, S.** (2019). Social buffering of stress in a group-  
415 living fish. *Proc. R. Soc. B Biol. Sci.* **286**, 20191626.
- 416 **Desjardins, J. K., Fitzpatrick, J. L., Stiver, K. A., Van der Kraak, G. J. and Balshine, S.**  
417 (2008). Costs and benefits of polygyny in the cichlid *Neolamprologus pulcher*. *Anim.*  
418 *Behav.* **75**, 1771–1779.
- 419 **Flack, J. C., Krakauer, D. C. and De Waal, F. B. M.** (2005). Robustness mechanisms in  
420 primate societies: A perturbation study. *Proc. R. Soc. B Biol. Sci.* **272**, 1091–1099.
- 421 **Flack, J. C., Girvan, M., De Waal, F. B. M. and Krakauer, D. C.** (2006). Policing stabilizes  
422 construction of social niches in primates. *Nature* **439**, 426–429.
- 423 **Foster, W. A. and Treherne, J. E.** (1981). Evidence for the dilution effect in the selfish herd  
424 from fish predation on a marine insect. *Nature* **293**, 466–467.
- 425 **Friard, O. and Gamba, M.** (2016). BORIS: a free, versatile open-source event-logging software  
426 for video/audio coding and live observations. *Methods Ecol. Evol.* **7**, 1325–1330.
- 427 **Getty, T.** (1987). Dear enemies and the prisoner's dilemma: Why should territorial neighbors  
428 form defensive coalitions? *Integr. Comp. Biol.* **27**, 327–336.
- 429 **Gilmour, K. M., Craig, P. M., Dhillon, R. S., Lau, G. Y. and Richards, J. G.** (2017).  
430 Regulation of energy metabolism during social interactions in rainbow trout: A role for  
431 AMP-activated protein kinase. *Am. J. Physiol. - Regul. Integr. Comp. Physiol.* **313**, R549–  
432 R559.
- 433 **Goldenberg, S. Z., Douglas-Hamilton, I. and Wittemyer, G.** (2016). Vertical Transmission of

- 434 Social Roles Drives Resilience to Poaching in Elephant Networks. *Curr. Biol.* **26**, 75–79.
- 435 **Grantner, A. and Taborsky, M.** (1998). The metabolic rates associated with resting, and with  
436 the performance of agonistic, submissive and digging behaviours in the cichlid fish  
437 *Neolamprologus pulcher* (Pisces: Cichlidae). *J. Comp. Physiol. - B Biochem. Syst. Environ.*  
438 *Physiol.* **168**, 427–433.
- 439 **Guderley, H.** (2009). Muscle metabolic capacities and plasma cortisol levels of the male three-  
440 spine stickleback *Gasterosteus aculeatus*: Are there “femme fatale” or “macho male”  
441 effects? *Physiol. Biochem. Zool.* **82**, 653–661.
- 442 **Guderley, H. and Couture, P.** (2005). Stickleback fights: Why do winners win? Influence of  
443 metabolic and morphometric parameters. *Physiol. Biochem. Zool.* **78**, 173–181.
- 444 **Heg, D., Brouwer, L., Bacharl, Z. and Taborsky, M.** (2019). Large Group Size Yields Group  
445 Stability in the Cooperatively Breeding Cichlid *Neolamprologus pulcher* Author ( s ): Dik  
446 Heg , Lyanne Brouwer , Zina Bachar and Michael Taborsky Source : Behaviour , Vol . 142 ,  
447 No . 11 / 12 , Cooperation and Conflict over In. **142**, 1615–1641.
- 448 **Hennessy, M. B., Maken, D. S. and C. Graves, F.** (2000). Consequences of the presence of the  
449 mother or unfamiliar adult female on cortisol, ACTH, testosterone and behavioral responses  
450 of periadolescent guinea pigs during exposure to novelty. *Psychoneuroendocrinology*.
- 451 **Huntingford, F., Tamilselvan, P. and Jenjan, H.** (2012). Why do some fish fight more than  
452 others? *Physiol. Biochem. Zool.* **85**, 584–593.
- 453 **Johnston, I. A. and Moon, T. W.** (1981). Fine structure and metabolism of multiply innervated  
454 fast muscle fibres in teleost fish. *Cell Tissue Res.* **219**, 93–109.
- 455 **Kappeler, P. M., Cremer, S. and Nunn, C. L.** (2015). Sociality and health: Impacts of sociality  
456 on disease susceptibility and transmission in animal and human societies. *Philos. Trans. R.*  
457 *Soc. B Biol. Sci.* **370**,.
- 458 **Kasumovic, M. M. and Seebacher, F.** (2013). The active metabolic rate predicts a male  
459 spider’s proximity to females and expected fitness. *Biol. Lett.* **9**,.
- 460 **Kikusui, T., Winslow, J. T. and Mori, Y.** (2006). Social buffering: Relief from stress and  
461 anxiety. *Philos. Trans. R. Soc. B Biol. Sci.* **361**, 2215–2228.
- 462 **Laskowski, K. L. and Pruitt, J. N.** (2014). Evidence of social niche construction : persistent  
463 and repeated social interactions generate stronger personalities in a social spider Evidence  
464 of social niche construction : persistent and repeated social interactions generate stronger



- 465 personalities in a. *Proc. R. Soc. B* **281**, 20133166.
- 466 **Le François, N. R., Lamarre, S. G. and Blier, P. U.** (2005). Is white muscle anaerobic  
467 glycolysis capacity indicative of competitive ability in Arctic charr? *J. Fish Biol.* **66**, 1167–  
468 1176.
- 469 **Livia Terranova, M., Cirulli, F. and Laviola, G.** (1999). Behavioral and hormonal effects of  
470 partner familiarity in periadolescent rat pairs upon novelty exposure.  
471 *Psychoneuroendocrinology*.
- 472 **Marler, C. A., Walsberg, G., White, M. L., Moore, M. and Marler, C. A.** (1995). Increased  
473 energy expenditure due to increased territorial defense in male lizards after phenotypic  
474 manipulation. *Behav. Ecol. Sociobiol.* **37**, 225–231.
- 475 **McCowan, B., Beisner, B. A., Capitano, J. P., Jackson, M. E., Cameron, A. N., Seil, S.,**  
476 **Atwill, E. R. and Fushing, H.** (2011). Network stability is a balancing act of personality,  
477 power, and conflict dynamics in rhesus macaque societies. *PLoS One* **6**.
- 478 **Modlmeier, A. P., Liebmann, J. E. and Foitzik, S.** (2012). Diverse societies are more  
479 productive: A lesson from ants. *Proc. R. Soc. B Biol. Sci.* **279**, 2142–2150.
- 480 **Nadler, L. E., Killen, S. S., McClure, E. C., Munday, P. L. and McCormick, M. I.** (2016).  
481 Shoaling reduces metabolic rate in a gregarious coral reef fish species. *J. Exp. Biol.* **219**,  
482 2802–2805.
- 483 **Pardon, M. C., Kendall, D. A., Pérez-Díaz, F., Duxon, M. S. and Marsden, C. A.** (2004).  
484 Repeated sensory contact with aggressive mice rapidly leads to an anticipatory increase in  
485 core body temperature and physical activity that precedes the onset of aversive responding.  
486 *Eur. J. Neurosci.* **20**, 1033–1050.
- 487 **Plaut, I.** (2001). Critical swimming speed: Its ecological relevance. In *Comparative*  
488 *Biochemistry and Physiology - A Molecular and Integrative Physiology*, .
- 489 **Regan, M. D., Dhillon, R. S., Toews, D. P. L., Speers-Roesch, B., Sackville, M. A., Pinto, S.,**  
490 **Bystriansky, J. S. and Scott, G. R.** (2015). Biochemical correlates of aggressive behavior  
491 in the Siamese fighting fish. *J. Zool.* **297**, 99–107.
- 492 **Siracusa, E., Boutin, S., Humphries, M. M., Gorrell, J. C., Coltman, D. W., Dantzer, B.,**  
493 **Lane, J. E. and McAdam, A. G.** (2017). Familiarity with neighbours affects intrusion risk  
494 in territorial red squirrels. *Anim. Behav.*
- 495 **Sopinka, N. M., Fitzpatrick, J. L., Desjardins, J. K., Stiver, K. A., Marsh-Rollo, S. E. and**

- 496 **Balshine, S.** (2009). Liver size reveals social status in the African cichlid *Neolamprologus*  
497 *pulcher*. *J. Fish Biol.* **75**, 1–16.
- 498 **Stiver, K. A., Dierkes, P., Taborsky, M. and Balshine, S.** (2004). Dispersal patterns and status  
499 change in a co-operatively breeding cichlid *Neolamprologus pulcher*: Evidence from  
500 microsatellite analyses and behavioural observations. *J. Fish Biol.* **65**, 91–105.
- 501 **Symington, M. . M.** (1988). Food Competition and Foraging Party Size in the Black Spider  
502 Monkey ( *Ateles paniscus chamek* ). *Behaviour* **105**, 117–134.
- 503 **Taborsky, M. and Limberger, D.** (1981). Helpers in fish. *Behav. Ecol. Sociobiol.* **8**, 143–145.
- 504 **Vigelsø, A., Andersen, N. B. and Dela, F.** (2014). The relationship between skeletal muscle  
505 mitochondrial citrate synthase activity and whole body oxygen uptake adaptations in  
506 response to exercise training. *Int J Physiol Pathophysiol Pharmacol* **6**, 84–101.
- 507 **Waal, F. B. M. De** (2000). Primates — A Natural Heritage of Conflict Resolution. *Science* (80-  
508 ). **289**, 586–590.
- 509 **Wong, M. and Balshine, S.** (2011). The evolution of cooperative breeding in the African cichlid  
510 fish, *Neolamprologus pulcher*. *Biol. Rev.* **86**, 511–530.
- 511 **Wong, M. Y. L., Jordan, L. A., Marsh-Rollo, S., St-Cyr, S., Reynolds, J. O., Stiver, K. A.,**  
512 **Desjardins, J. K., Fitzpatrick, J. L. and Balshine, S.** (2012). Mating systems in  
513 cooperative breeders: The roles of resource dispersion and conflict mitigation. *Behav. Ecol.*  
514 **23**, 521–530.
- 515

516 **Table 1.** Statistical parameters for final (minimal) GLMM for dominance and affiliation indices.

| <b>Dominance</b>   | <b>Fixed Factor</b>                      | <b>F</b> | <b>Num df</b> | <b>Den df</b> | <b>p</b> |
|--------------------|------------------------------------------|----------|---------------|---------------|----------|
|                    | Treatment                                | 5.439    | 1             | 22            | 0.029    |
|                    | Time point                               | 1.137    | 3             | 554           | 0.334    |
|                    | Group Size                               | 8.138    | 1             | 22            | 0.009    |
|                    | Class                                    | 146.405  | 2             | 554           | < .001   |
|                    | Treatment * Time point                   | 0.44     | 3             | 554           | 0.724    |
|                    | Treatment * Group Size                   | 4.782    | 1             | 22            | 0.04     |
|                    | Time point * Group Size                  | 0.514    | 3             | 554           | 0.673    |
|                    | Treatment * Class                        | 31.266   | 2             | 554           | < .001   |
|                    | Time point * Class                       | 3.944    | 6             | 554           | < .001   |
|                    | Group Size * Class                       | 4.463    | 2             | 554           | 0.012    |
|                    | Treatment * Time point * Group Size      | 0.527    | 3             | 554           | 0.664    |
|                    | Treatment * Time point * Class           | 3.809    | 6             | 554           | < .001   |
|                    | Treatment * Group Size * Class           | 2.242    | 2             | 554           | 0.107    |
|                    | Time point * Group Size * Class          | 5.069    | 6             | 554           | < .001   |
|                    | Treatment * Hours * Group Size * Subject | 3.685    | 6             | 554           | 0.001    |
| <b>Affiliation</b> |                                          |          |               |               |          |
|                    | Group Size                               | 0.00442  | 1             | 22            | 0.948    |
|                    | Treatment                                | 3.12959  | 1             | 22            | 0.091    |
|                    | Trial #                                  | 11.43825 | 1             | 580           | < .001   |
|                    | Class                                    | 8.02106  | 2             | 580           | < .001   |
|                    | Time point                               | 1.98344  | 3             | 580           | 0.115    |
|                    | Group Size * Treatment                   | 1.25136  | 1             | 22            | 0.275    |
|                    | Treatment * Time point                   | 1.75654  | 3             | 580           | 0.154    |
|                    | Trial # * Time point                     | 5.4469   | 3             | 580           | 0.001    |
|                    | Group Size * Time point                  | 1.1949   | 3             | 580           | 0.311    |
|                    | Group Size * Treatment * Time point      | 2.74729  | 3             | 580           | 0.042    |

517 Numerator degrees of freedom, Num df; Denominator degrees of freedom, Den df; Shading, p < 0.05.

518

519

520

521 **Table 2.** Statistical parameters for final (minimal) GLM for female-level effects.

| <b>Morphometrics on Max Dom</b> | <b>SS</b> | <b>df</b> | <b>F</b> | <b>p</b> |
|---------------------------------|-----------|-----------|----------|----------|
| Model                           | 1501      | 3         | 2.5      | 0.086    |
| BM                              | 295       | 1         | 1.48     | 0.237    |
| Group Size                      | 636       | 1         | 3.18     | 0.088    |
| Group Size * BM                 | 902       | 1         | 4.51     | 0.045    |
| Residuals                       | 4400      | 22        |          |          |
| <b>Liver LDH</b>                |           |           |          |          |
| Model                           | 2.266     | 5         | 1.796    | 0.164    |
| BM                              | 0.154     | 1         | 0.612    | 0.444    |
| Treatment                       | 1.64      | 1         | 6.502    | 0.02     |
| Max Dominance                   | 0.203     | 1         | 0.803    | 0.382    |
| Muscle LDH                      | 1.115     | 1         | 4.419    | 0.05     |
| Treatment * Max Dominance       | 1.649     | 1         | 6.536    | 0.02     |
| Residuals                       | 4.541     | 18        |          |          |
| <b>Muscle LDH</b>               |           |           |          |          |
| Model                           | 735.17    | 6         | 2.911    | 0.037    |
| BM                              | 79.48     | 1         | 1.888    | 0.186    |
| Treatment                       | 128.44    | 1         | 3.051    | 0.098    |
| Max Dominance                   | 13.16     | 1         | 0.313    | 0.583    |
| Group Size                      | 4.98      | 1         | 0.118    | 0.735    |
| Group Size * Max Dominance      | 244.01    | 1         | 5.797    | 0.027    |
| Treatment * Max Dominance       | 331.37    | 1         | 7.872    | 0.012    |
| Residuals                       | 757.69    | 18        |          |          |
| <b>Liver CS</b>                 |           |           |          |          |
| Model                           | 0.00445   | 1         | 0.184    | 0.672    |
| BM                              | 0.00445   | 1         | 0.184    | 0.672    |
| Residuals                       | 0.53122   | 22        |          |          |
| <b>Muscle CS</b>                |           |           |          |          |
| Model                           | 0.3       | 1         | 0.211    | 0.65     |
| BM                              | 0.3       | 1         | 0.211    | 0.65     |
| Residuals                       | 34.19     | 24        |          |          |

522 BM, body mass; Max Dominance, Maximum Dominance Index Observed; Shading,  $p < 0.05$ .

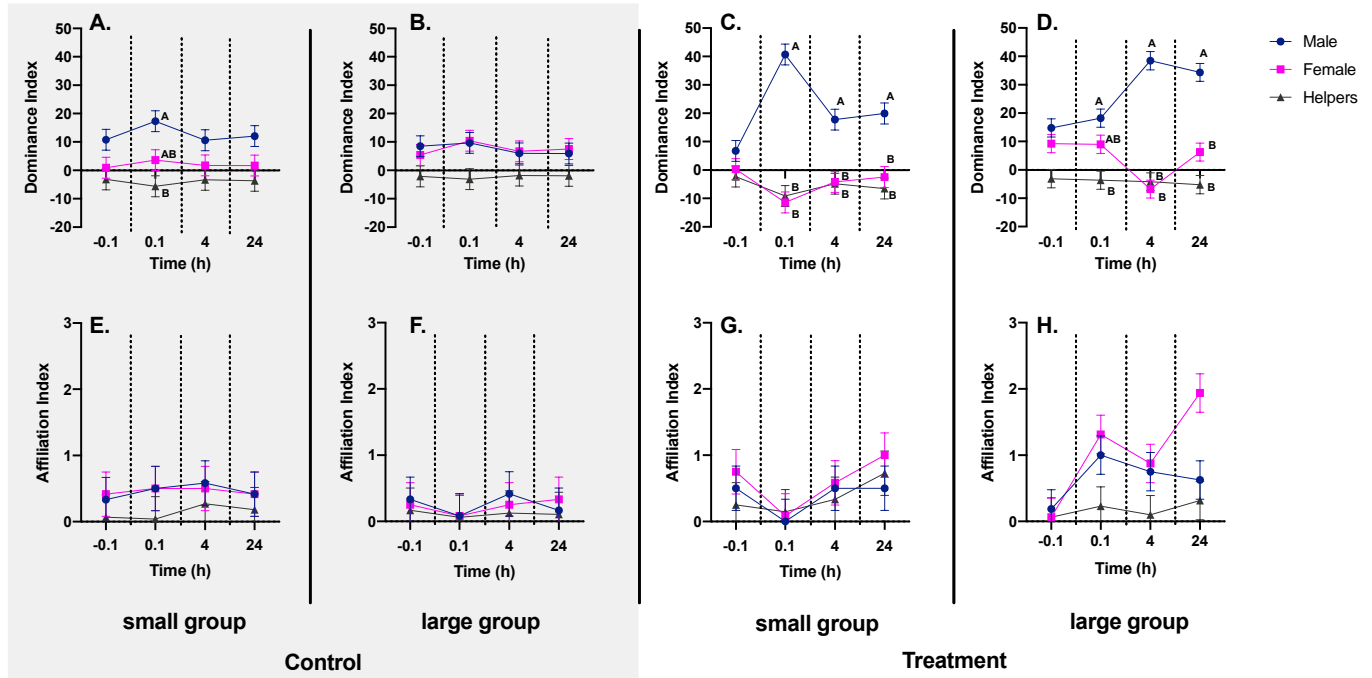

523

524 **Figure 1. Time courses for mean dominance and affiliation indices.** Mean dominance indices  
 525 in males (blue), females (pink), and helpers (grey) from small and large control (A and B,  
 526 respectively) and treatment (C and D, respectively) groups. Mean affiliation indices from small  
 527 and large control (E and F, respectively) and treatment (G and H, respectively) groups. Different  
 528 letters represent differences between males, females and helpers within each respective  
 529 timepoint, as determined by *post hoc* comparisons.

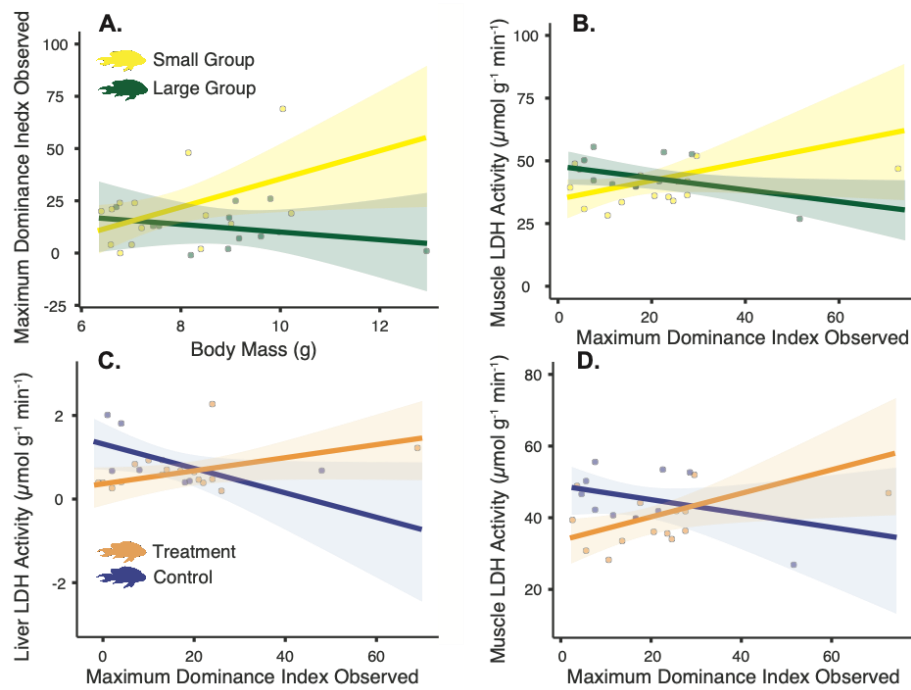

530

531 **Figure 2. Relationships between the maximum dominance we observed (Maximum**  
532 **Dominance Index) and body mass (A), Muscle LDH activity (B), Liver LDH activity (C),**  
533 **and Muscle LDH activity (D).** Small and large groups (A,B) are represented by yellow and  
534 green, respectively, whereas treatment and control groups (C,D) are represented by orange and  
535 blue, respectively. Enclosed circles represent observed scores. Note, the directionality and  
536 patterns of the relationship remain when we remove the two most extreme data points.

537

538 **File S1.** Post-hoc pairwise comparisons for dominance index GLMM.

539 **File S2.** Post-hoc pairwise comparisons for affiliation index GLMM.

540

541 **Appendix 1.** Statistical parameters for the saturated GLMM for dominance indices.

|                                                    | F        | Num df | Den df | p      |
|----------------------------------------------------|----------|--------|--------|--------|
| Treatment                                          | 5.4276   | 1      | 528    | 0.020  |
| Perturbation                                       | 9.96e-4  | 1      | 528    | 0.975  |
| Time Point                                         | 1.1063   | 3      | 528    | 0.346  |
| Group Size                                         | 8.1205   | 1      | 528    | 0.005  |
| Subject                                            | 142.4906 | 2      | 528    | < .001 |
| Treatment * Perturbation                           | 0.3960   | 1      | 528    | 0.529  |
| Treatment * Time Point                             | 0.4287   | 3      | 528    | 0.733  |
| Perturbation * Time Point                          | 0.0933   | 3      | 528    | 0.964  |
| Treatment * Group Size                             | 4.7720   | 1      | 528    | 0.029  |
| Perturbation * Group Size                          | 3.23e-4  | 1      | 528    | 0.986  |
| Time Point * Group Size                            | 0.5007   | 3      | 528    | 0.682  |
| Treatment * Subject                                | 30.4299  | 2      | 528    | < .001 |
| Perturbation * Subject                             | 2.5110   | 2      | 528    | 0.082  |
| Time Point * Subject                               | 3.8386   | 6      | 528    | < .001 |
| Group Size * Subject                               | 4.3436   | 2      | 528    | 0.013  |
| Treatment * Perturbation * Time Point              | 0.0426   | 3      | 528    | 0.988  |
| Treatment * Perturbation * Group Size              | 0.3010   | 1      | 528    | 0.583  |
| Treatment * Time Point * Group Size                | 0.5125   | 3      | 528    | 0.674  |
| Perturbation * Time Point * Group Size             | 0.1396   | 3      | 528    | 0.936  |
| Treatment * Perturbation * Subject                 | 2.6552   | 2      | 528    | 0.071  |
| Treatment * Time Point * Subject                   | 3.7067   | 6      | 528    | 0.001  |
| Perturbation * Time Point * Subject                | 0.8327   | 6      | 528    | 0.545  |
| Treatment * Group Size * Subject                   | 2.1819   | 2      | 528    | 0.114  |
| Perturbation * Group Size * Subject                | 0.6660   | 2      | 528    | 0.514  |
| Time Point * Group Size * Subject                  | 4.9333   | 6      | 528    | < .001 |
| Treatment * Perturbation * Time Point * Group Size | 0.0948   | 3      | 528    | 0.963  |
| Treatment * Perturbation * Time Point * Subject    | 0.5351   | 6      | 528    | 0.782  |



|                                                              | <b>F</b> | <b>Num df</b> | <b>Den df</b> | <b>p</b> |
|--------------------------------------------------------------|----------|---------------|---------------|----------|
| Treatment * Perturbation * Group Size * Subject              | 1.9841   | 2             | 528           | 0.139    |
| Treatment * Time Point * Group Size * Subject                | 3.5868   | 6             | 528           | 0.002    |
| Perturbation * Time Point * Group Size * Subject             | 0.5734   | 6             | 528           | 0.752    |
| Treatment * Perturbation * Time Point * Group Size * Subject | 0.8689   | 6             | 528           | 0.517    |

Numerator degrees of freedom, Num df; Denominator degrees of freedom, Den df.

542

543

544

545

546 **Appendix 2.** Statistical parameters for the saturated GLMM for Affiliation indices.

|                                            | <b>F</b> | <b>Num df</b> | <b>Den df</b> | <b>p</b> |
|--------------------------------------------|----------|---------------|---------------|----------|
| Group Size                                 | 0.00442  | 1             | 22.0          | 0.948    |
| Treatment                                  | 3.12960  | 1             | 22.0          | 0.091    |
| Trial #                                    | 10.75636 | 1             | 506.0         | 0.001    |
| Subject                                    | 6.41299  | 2             | 506.0         | 0.002    |
| Hours                                      | 1.93144  | 3             | 506.0         | 0.124    |
| Group Size * Treatment                     | 1.25136  | 1             | 22.0          | 0.275    |
| Group Size * Trial #                       | 1.15353  | 1             | 506.0         | 0.283    |
| Treatment * Trial #                        | 1.17067  | 1             | 506.0         | 0.280    |
| Group Size * Subject                       | 0.49489  | 2             | 506.0         | 0.610    |
| Treatment * Subject                        | 1.57884  | 2             | 506.0         | 0.207    |
| Trial # * Subject                          | 0.83349  | 2             | 506.0         | 0.435    |
| Group Size * Hours                         | 1.16357  | 3             | 506.0         | 0.323    |
| Treatment * Hours                          | 1.71051  | 3             | 506.0         | 0.164    |
| Trial # * Hours                            | 4.70137  | 3             | 506.0         | 0.003    |
| Subject * Hours                            | 0.62838  | 6             | 506.0         | 0.708    |
| Group Size * Treatment * Trial #           | 0.16617  | 1             | 506.0         | 0.684    |
| Group Size * Treatment * Subject           | 2.01673  | 2             | 506.0         | 0.134    |
| Group Size * Trial # * Subject             | 0.71484  | 2             | 506.0         | 0.490    |
| Treatment * Trial # * Subject              | 0.98941  | 2             | 506.0         | 0.373    |
| Group Size * Treatment * Hours             | 2.67528  | 3             | 506.0         | 0.047    |
| Group Size * Trial # * Hours               | 1.04450  | 3             | 506.0         | 0.372    |
| Treatment * Trial # * Hours                | 1.98722  | 3             | 506.0         | 0.115    |
| Group Size * Subject * Hours               | 0.57562  | 6             | 506.0         | 0.750    |
| Treatment * Subject * Hours                | 0.36084  | 6             | 506.0         | 0.904    |
| Trial # * Subject * Hours                  | 0.95883  | 6             | 506.0         | 0.453    |
| Group Size * Treatment * Trial # * Subject | 0.59126  | 2             | 506.0         | 0.554    |

|                                                    | <b>F</b> | <b>Num df</b> | <b>Den df</b> | <b>p</b> |
|----------------------------------------------------|----------|---------------|---------------|----------|
| Group Size * Treatment * Trial # * Hours           | 0.26749  | 3             | 506.0         | 0.849    |
| Group Size * Treatment * Subject * Hours           | 0.49915  | 6             | 506.0         | 0.809    |
| Group Size * Trial # * Subject * Hours             | 0.28290  | 6             | 506.0         | 0.945    |
| Treatment * Trial # * Subject * Hours              | 0.52073  | 6             | 506.0         | 0.793    |
| Group Size * Treatment * Trial # * Subject * Hours | 0.42951  | 6             | 506.0         | 0.859    |

Numerator degrees of freedom, Num df; Denominator degrees of freedom, Den df.

547

548

549 **Appendix 3.** Statistical parameters for saturated GLMs for female-level effects.

| <b>Morphometrics on Max Dom</b> | <b>SS</b> | <b>df</b> | <b>F</b> | <b>p</b> |
|---------------------------------|-----------|-----------|----------|----------|
| Model                           | 2442.294  | 11        | 0.8988   | 0.564    |
| BM                              | 164.304   | 1         | 0.6651   | 0.428    |
| Group Size                      | 94.829    | 1         | 0.3839   | 0.545    |
| CSI                             | 15.386    | 1         | 0.0623   | 0.807    |
| HSI                             | 45.337    | 1         | 0.1835   | 0.675    |
| Treatment                       | 25.774    | 1         | 0.1043   | 0.751    |
| Group Size * BM                 | 233.23    | 1         | 0.9442   | 0.348    |
| Group Size * Treatment          | 0.12      | 1         | 4.86E-04 | 0.983    |
| Group Size * CSI                | 75.255    | 1         | 0.3046   | 0.59     |
| CSI * Treatment                 | 233.335   | 1         | 0.9446   | 0.348    |
| HSI * Treatment                 | 524.486   | 1         | 2.1232   | 0.167    |
| HSI * Group Size                | 133.205   | 1         | 0.5392   | 0.475    |
| Residuals                       | 3458.322  | 14        |          |          |
| <b>Liver LDH</b>                |           |           |          |          |
| Model                           | 3.67436   | 11        | 1.2794   | 0.338    |
| Group Size                      | 0.3807    | 1         | 1.4581   | 0.25     |
| Treatment                       | 0.20812   | 1         | 0.7971   | 0.39     |
| Max Dominance                   | 1.05367   | 1         | 4.0356   | 0.068    |
| BM                              | 0.00819   | 1         | 0.0314   | 0.862    |
| Muscle LDH                      | 0.04969   | 1         | 0.1903   | 0.67     |
| Muscle CS                       | 0.68879   | 1         | 2.6381   | 0.13     |
| Liver CS                        | 0.45984   | 1         | 1.7612   | 0.209    |
| Group Size * Treatment          | 0.05786   | 1         | 0.2216   | 0.646    |
| Group Size * Max Dominance      | 0.6402    | 1         | 2.452    | 0.143    |
| Treatment * Max Dominance       | 0.77553   | 1         | 2.9703   | 0.11     |
| Group Size * Treatment *        |           |           |          |          |
| Max Dominance                   | 0.29952   | 1         | 1.1472   | 0.305    |
| Residuals                       | 3.13309   | 12        |          |          |
| <b>Muscle LDH</b>               |           |           |          |          |
| Model                           | 946.99    | 10        | 2.9452   | 0.036    |
| BM                              | 58.17     | 1         | 1.809    | 0.202    |
| Treatment                       | 113.65    | 1         | 3.5344   | 0.083    |
| Max Dominance                   | 11.27     | 1         | 0.3504   | 0.564    |
| Group Size                      | 23.26     | 1         | 0.7233   | 0.41     |
| Muscle CS                       | 175.42    | 1         | 5.4555   | 0.036    |
| Liver CS                        | 83.74     | 1         | 2.6042   | 0.131    |
| Group Size * Treatment          | 10.61     | 1         | 0.3301   | 0.575    |

|                            |          |    |         |       |
|----------------------------|----------|----|---------|-------|
| Group Size * Max Dominance | 81.32    | 1  | 2.529   | 0.136 |
| Treatment * Max Dominance  | 82.1     | 1  | 2.5534  | 0.134 |
| Group Size * Treatment *   |          |    |         |       |
| Max Dominance              | 2.57     | 1  | 0.0799  | 0.782 |
| Residuals                  | 418      | 13 |         |       |
| <b>Liver CS</b>            |          |    |         |       |
| Model                      | 0.25927  | 11 | 1.023   | 0.481 |
| Group Size                 | 0.00982  | 1  | 0.426   | 0.526 |
| Max Dominance              | 0.10208  | 1  | 4.432   | 0.057 |
| Liver LDH                  | 0.04057  | 1  | 1.761   | 0.209 |
| Treatment                  | 0.11943  | 1  | 5.185   | 0.042 |
| BM                         | 0.03294  | 1  | 1.43    | 0.255 |
| Muscle LDH                 | 0.03466  | 1  | 1.505   | 0.243 |
| Muscle CS                  | 0.04297  | 1  | 1.866   | 0.197 |
| Group Size * Treatment     | 0.00676  | 1  | 0.294   | 0.598 |
| Group Size * Max Dominance | 0.13513  | 1  | 5.867   | 0.032 |
| Treatment * Max Dominance  | 0.00247  | 1  | 0.107   | 0.749 |
| Group Size * Treatment *   |          |    |         |       |
| Max Dominance              | 0.02706  | 1  | 1.175   | 0.3   |
| Residuals                  | 0.27639  | 12 |         |       |
| <b>Muscle CS</b>           |          |    |         |       |
| Model                      | 16.08533 | 11 | 1.33472 | 0.313 |
| Group Size                 | 0.02751  | 1  | 0.02511 | 0.877 |
| Treatment                  | 4.95256  | 1  | 4.52047 | 0.055 |
| Liver LDH                  | 2.8903   | 1  | 2.63813 | 0.13  |
| Muscle LDH                 | 3.07478  | 1  | 2.80651 | 0.12  |
| Liver CS                   | 2.04391  | 1  | 1.86558 | 0.197 |
| BM                         | 0.93274  | 1  | 0.85136 | 0.374 |
| Max Dominance              | 3.31084  | 1  | 3.02198 | 0.108 |
| Group Size * Treatment     | 0.00161  | 1  | 0.00147 | 0.97  |
| Group Size * Max Dominance | 3.34224  | 1  | 3.05064 | 0.106 |
| Treatment * Max Dominance  | 0.34866  | 1  | 0.31824 | 0.583 |
| Group Size * Treatment *   |          |    |         |       |
| Max Dominance              | 1.75561  | 1  | 1.60244 | 0.23  |
| Residuals                  | 13.14703 | 12 |         |       |

550 BM, body mass; Max Dominance, Maximum Dominance Index Observed; CSI, cardio somatic index; HIS, hepatic  
551 somatic index.

552

553 **Appendix 4.** Statistical parameters for final (minimal) GLM for female-level effects.

| <b>Liver LDH</b>           |          |    |         |       |
|----------------------------|----------|----|---------|-------|
| Model                      | 0.841    | 5  | 0.507   | 0.767 |
| BM                         | 0.196    | 1  | 0.593   | 0.451 |
| Treatment                  | 0.118    | 1  | 0.356   | 0.558 |
| Muscle LDH                 | 0.263    | 1  | 0.794   | 0.385 |
| Mean Activity              | 0.131    | 1  | 0.394   | 0.538 |
| Treatment * Mean Activity  | 0.173    | 1  | 0.522   | 0.479 |
| Residuals                  | 5.967    | 18 |         |       |
| <b>Muscle LDH</b>          |          |    |         |       |
| Model                      | 286.556  | 6  | 0.71265 | 0.644 |
| BM                         | 37.637   | 1  | 0.5616  | 0.463 |
| Treatment                  | 105.763  | 1  | 1.57816 | 0.225 |
| Group Size                 | 7.757    | 1  | 0.11575 | 0.738 |
| Mean Activity              | 46.458   | 1  | 0.69323 | 0.416 |
| Treatment * Mean Activity  | 0.127    | 1  | 0.00189 | 0.966 |
| Group Size * Mean Activity | 27.164   | 1  | 0.40534 | 0.532 |
| Residuals                  | 1206.302 | 18 |         |       |

554 BM, body mass; Max Dominance, Maximum Dominance Index Observed; Shading,  $p < 0.05$ .
